# Supplementary material
Source: Research Square preprint supplement (doi:10.21203/rs.3.rs-8702220/v1)
Supplement: Supplementary file 1 [file d3ae3a88365b925c8d19df0f.docx]

**Supplementary Table 1. List of upregulated proteins in responders, with functions and associated disorders**

| **Protein** | **Full Name** | **Location** | **Function** | **Disease (due to deficiency/dysfunction /mutation)** |
| --- | --- | --- | --- | --- |
| vWF | von Willebrand factor | Extracellular matrix | Maintenance of haemostasis, promotes adhesion of platelets to the sites of vascular injury, chaperone for coagulation factor VIII | A common hemorrhagic disorder due to defects in vWF resulting in  impaired platelet aggregation. |
| PROS1 | Vitamin K-dependent protein S | Secreted | Anticoagulant plasma protein, helps to prevent coagulation and stimulating fibrinolysis | A haemostatic disorder characterized by impaired regulation of blood coagulation and a tendency to recurrent venous thrombosis. |
| F10 | Coagulation factor X | Secreted | Converts prothrombin to thrombin in the presence of factor Va, calcium and phospholipid during blood clotting | Bleeding disorders include epistaxis (nose bleeding), gum bleeding, hematuria (blood in urine), prolonged or excessive bleeding following surgery or trauma. |
| LTF | Lactotransferrin | Secreted | Iron binding transport proteins, hematoma detoxification | Impaired iron transport, increased risk of infections and inflammation |
| ITIH3 | Inter-alpha-trypsin inhibitor heavy chain | Secreted | Act as a carrier of hyaluronan in serum or as a binding protein between hyaluronan and other matrix protein | Schizophrenia, dementia |
| QSOX1 | Quiescin Sulfhydryl Oxidase 1 | Golgi apparatus; Secreted | Disulfide bond formation in a variety of extracellular proteins, required for normal cell-cell adhesion and cell migration | No disorders found (No data available) |
| CTNNB1 | Catenin beta-1 | Intracellular | Regulation of cell adhesion, Promotes neurogenesis, Stem cell maintenance | Cancer (colorectal, skin, medulloblastoma, ovarian etc.) due to oncogenic mutations |
| NCAM1 | Neural cell adhesion molecule 1 | Cell membrane; secreted | A cell adhesion molecule involved in neuron- neuron adhesion, neurite fasciculation, outgrowth of neurites, etc. | Neuroendocrine carcinoma |
| SERPINB3 |  | Secreted | Act as a papain-like cysteine protease inhibitor to modulate the host immune response, neutrophil degranulation | No disorders found (No data available) |
| IGHV3-30 | Immunoglobulin heavy variable 3-30 | Cell membrane; secreted | Participate in the antigen recognition | No disorders found (No data available) |

**Supplementary Figure 1. Illustration of bladder anatomy and hypothesised eﬀect of**

**chlorophyllin (schematic)**


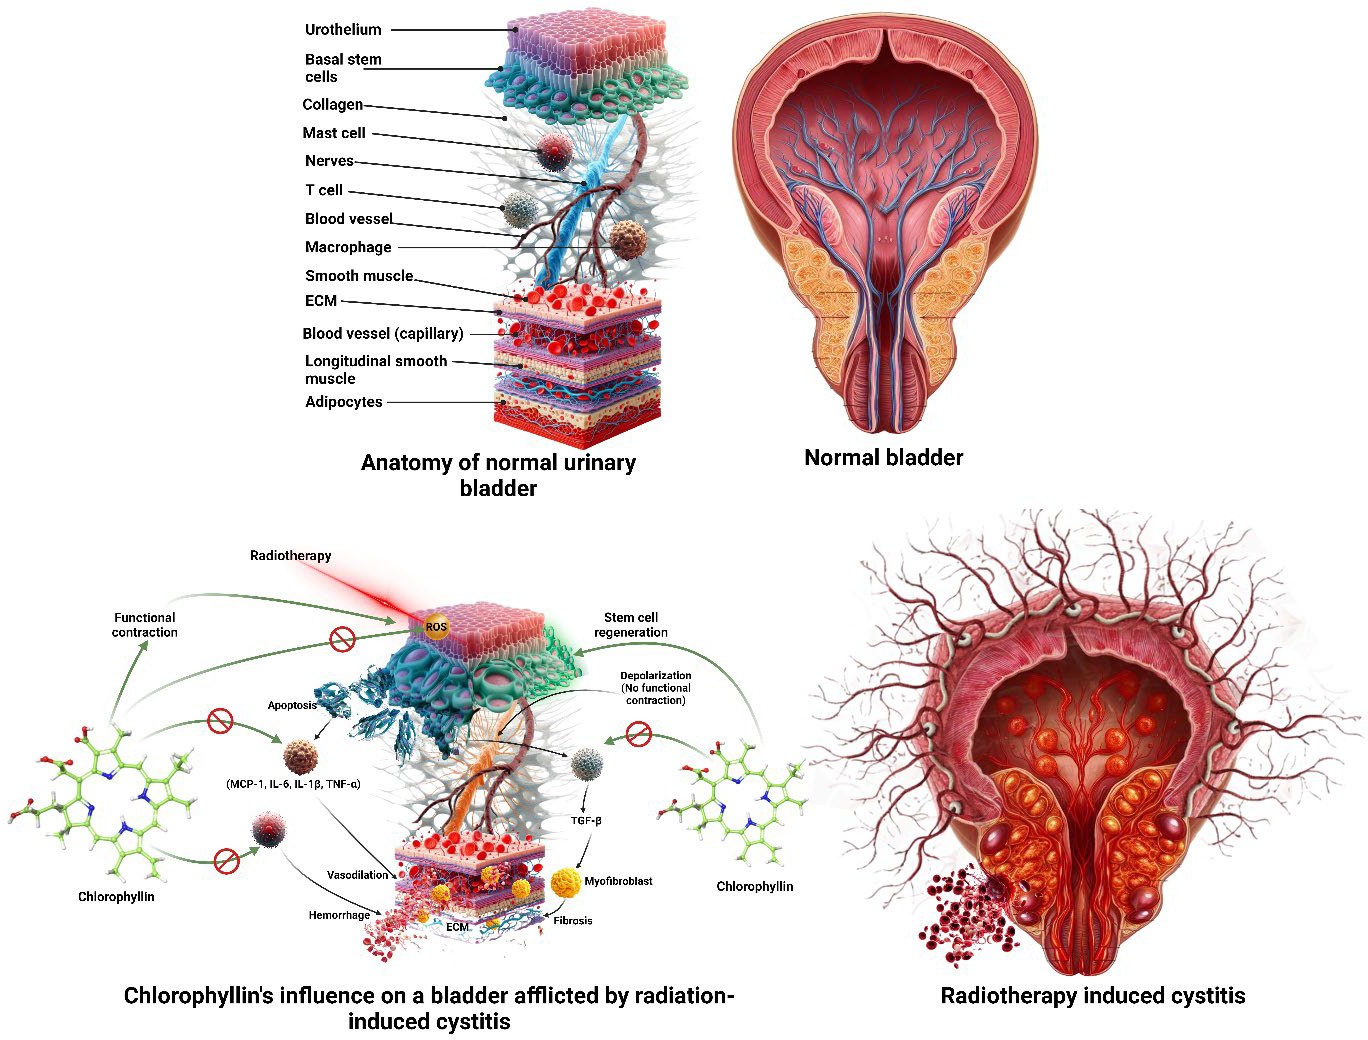


**Supplementary Figure 2. Proteomics workflow**


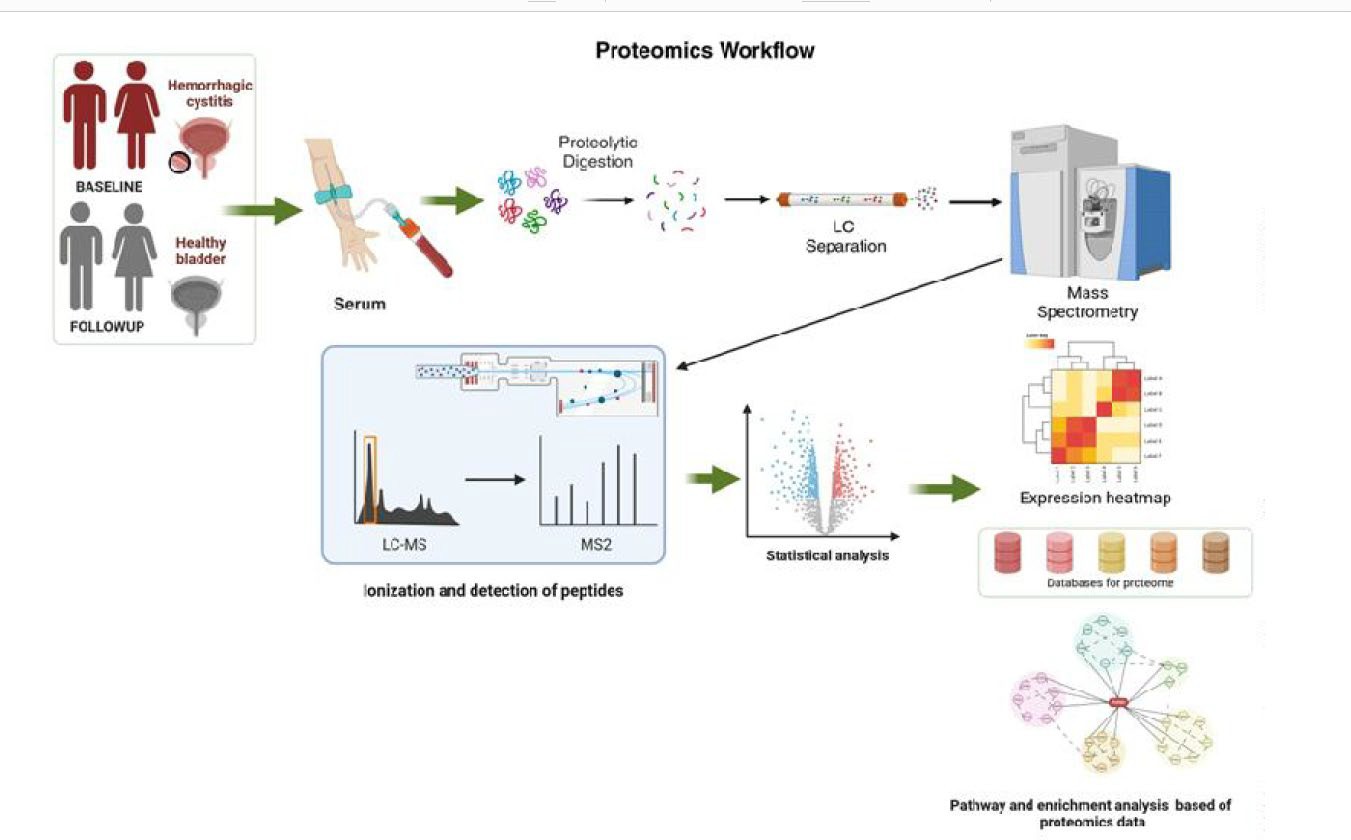


**Supplementary Information on Proteomics Analysis:**

**Sample Preparation:** Before analysis, proteins in each sample were first depleted,

followed by digestion, reduction with 5 mM TCEP, and alkylation with 50 mM

iodoacetamide. The digested samples underwent Trypsin digestion at a 1:50 ratio for

16 hours at 37°C. To remove salts, the digests were cleaned using a C18 silica

cartridge and subsequently dried using a speed vac. Finally, the dried pellet was

resuspended in buffer A, consisting of 2% acetonitrile and 0.1% formic acid.

**Mass Spectrometric Analysis of Peptide Mixtures:** The experiments were

conducted using an Easy-nlc-1000 system coupled with an Orbitrap Exploris mass

spectrometer. Peptide samples (1 μg) were loaded onto a 15 cm, 3.0 μm Acclaim

PepMap C18 column (Thermo Fisher Scientific) and separated using a gradient of

buffer B (80% acetonitrile, 0.1% formic acid) over 110 minutes at a flow rate of 500

nl/min. Following separation, the peptides were injected for MS analysis. MS1

spectra were acquired in the Orbitrap with specific settings, including dynamic

exclusion. MS2 spectra were collected for the top 20 peptides.

**Data Processing:** The acquired RAW files were processed using Proteome

Discoverer (v2.5). The database search was performed against the Uniprot Human

database with Sequest and Amanda algorithms. Specific search parameters

included precursor and fragment mass tolerances, enzyme specificity for trypsin/P,

and consideration of fixed and variable modifications. To ensure data quality, both

peptide spectrum match and protein false discovery rate were set to 0.01 FDR.

**Data analysis:** Depleted serum proteomics analysis approach was used to remove

highly abundant proteins, thereby enhancing the detection sensitivity for less

abundant proteins with potential prognostic or diagnostic relevance. Normalization of

protein abundance values against serum albumin levels within respective patient

groups was performed to ensure robust comparisons. Logarithmic transformation of

fold changes was computed to discern alterations in protein expression between

baseline and follow-up samples. A paired t-test was applied because baseline and

post-treatment samples were derived from the same patients. This design controls

for inter-individual variability in protein abundance and increases statistical power for

detecting within-person changes.

Patient ID-wise protein expression heatmap of Log2FC of significantly differentially

expressed proteins was generated using Python libraries ‘pandas’, seaborn’ and

‘matplotlib’ with a custom VIBGYOR colour palette. Furthermore, common proteins

exhibiting substantial upregulation (Log 2 FC &gt; 2, p &lt; 0.05) or downregulation (Log 2 FC

&gt; -2, p &lt; 0.05) among patients exhibiting positive responses to chlorophyllin

treatment were identified. The absolute and normalized log-transformed protein

abundance of these proteins at baseline and follow-up was graphically presented.

For pathway analysis and functional characterization, significantly differentially

expressed proteins were subjected to pathway mapping and enrichment analysis

using the WebGestalt platform (https://www.webgestalt.org/; 31114916; 28472511;

23703215; 15980575). Pathway overrepresentation analysis was conducted across

functional databases (KEGG, Panther, Wikipathway, and Reactome), with &39;Homo

sapiens&39; serving as the reference genome, and employing the Benjamini-Hochberg

method to control the false discovery rate (FDR &lt; 0.05). An integrated pathway

overrepresentation plot was constructed, consolidating outputs from individual

databases based on maximum enrichment ratio and minimum FDR value.

Furthermore, leveraging protein and pathway lists, a flowchart elucidating the

mechanism of action of chlorophyllin was generated using Lucidchart. Additionally,

an illustrative depiction detailing the preventive effects of chlorophyllin against

radiation-induced hemorrhagic cystitis was crafted using Biorender.
